# Supplementary material for: The Effects of Postpartum Yak Metabolism on Reproductive System Recovery
Source: MDPI journal article supplement (doi:10.3390/metabo12111113), 2022-11-15
Supplement: s1 [file s1]

# Supplementary Materials

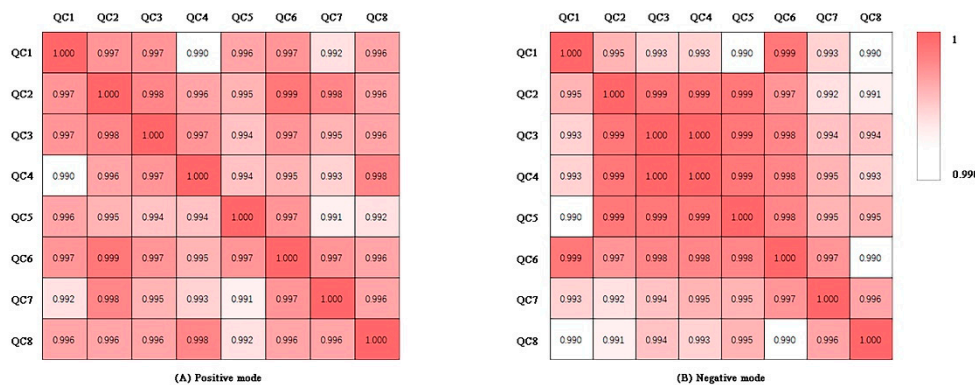

**Figure S1.** The correlation analysis of the QC samples in positive and negative ion modes. A is positive ion modes; B is negative ion modes.

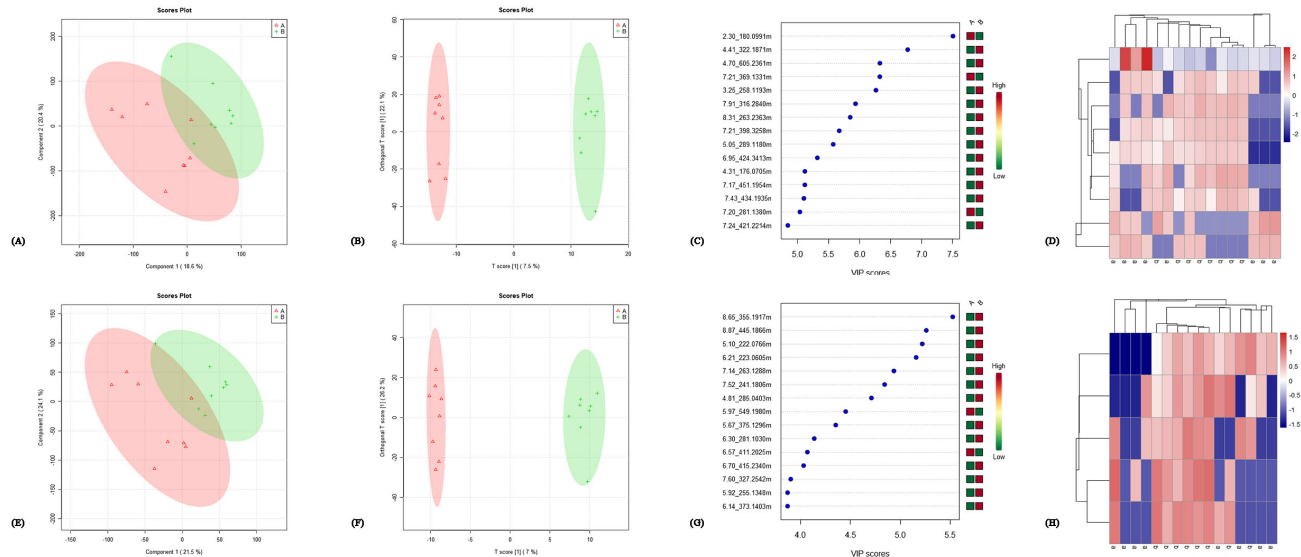

**Figure S2.** PLS-DA, OPLS-DA, VIP scores and cluster diagram analysis results taking B/A; The figures in the first line (A–D) are the analysis results in the positive ion mode, which are, respectively, PLS-DA, OPLS-DA, VIP scores and cluster diagram analysis; the second line (E–H) are the analysis results in the negative ion mode.

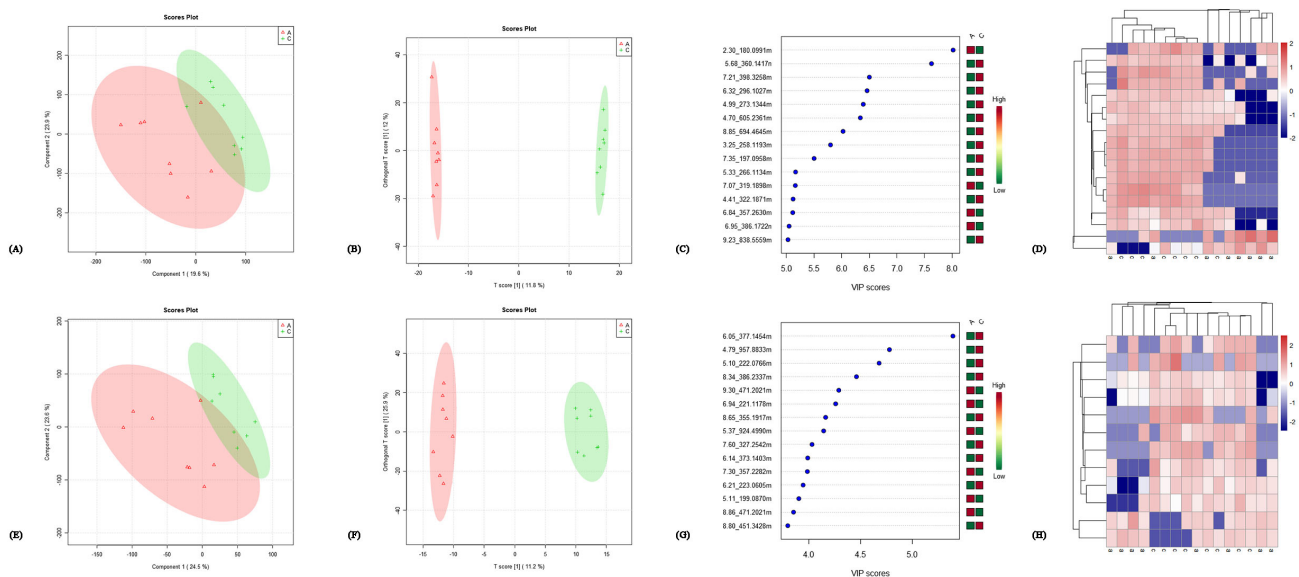

**Figure S3.** PLS-DA, OPLS-DA, VIP scores and cluster diagram analysis results taking C/A; The figures in the first line (A–D) are the analysis results in the positive ion mode, which are, respectively, PLS-DA, OPLS-DA, VIP scores and cluster diagram analysis; the second line (E–H) are the analysis results in the negative ion mode.

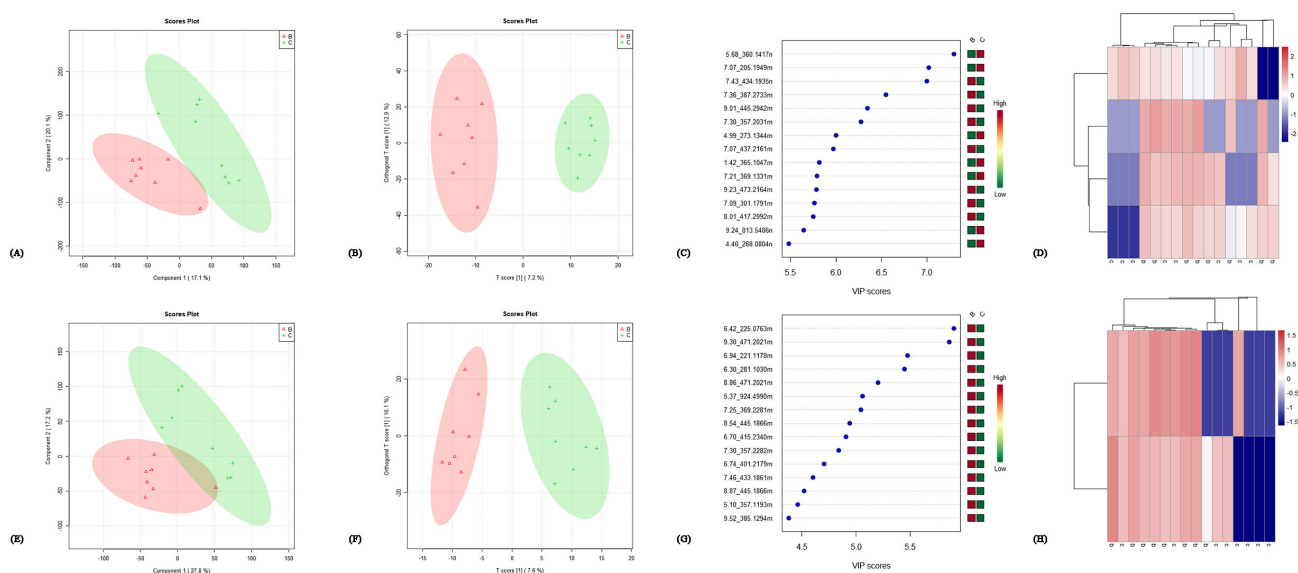

**Figure S4.** PLS-DA, OPLS-DA, VIP scores and cluster diagram analysis results taking C/B; The figures in the first line (A–D) are the analysis results in the positive ion mode, which are, respectively, PLS-DA, OPLS-DA, VIP scores and cluster diagram analysis; the second line (E–H) are the analysis results in the negative ion mode.

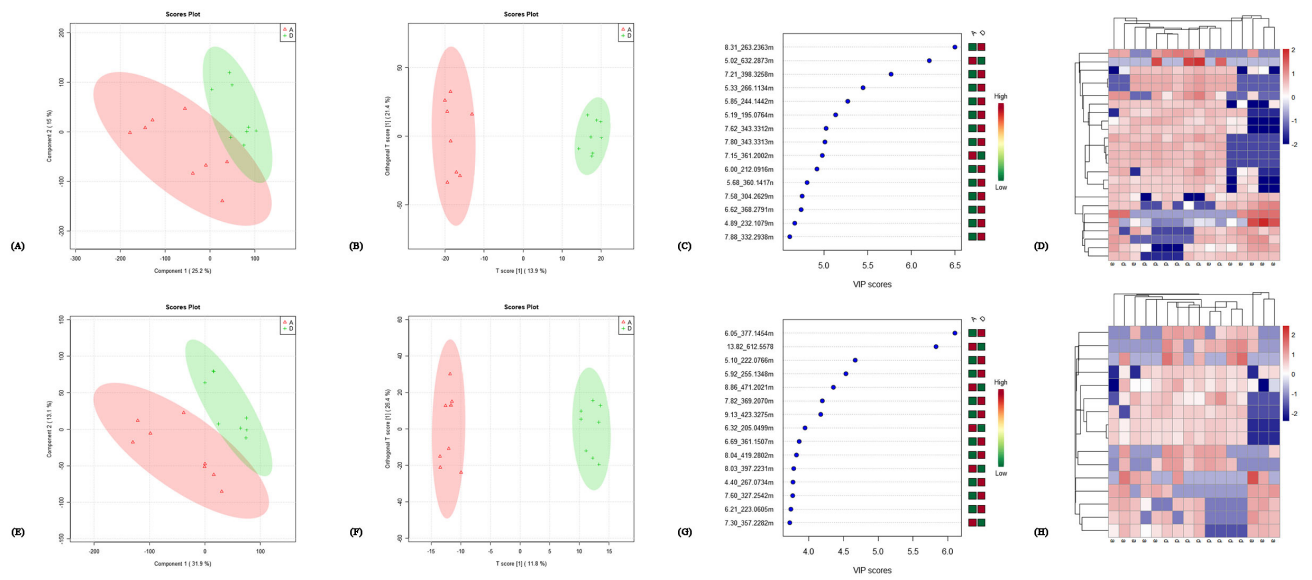

**Figure S5.** PLS-DA, OPLS-DA, VIP scores and cluster diagram analysis results taking D/A; The figures in the first line (A–D) are the analysis results in the positive ion mode, which are, respectively, PLS-DA, OPLS-DA, VIP scores and cluster diagram analysis; the second line (E–H) are the analysis results in the negative ion mode.

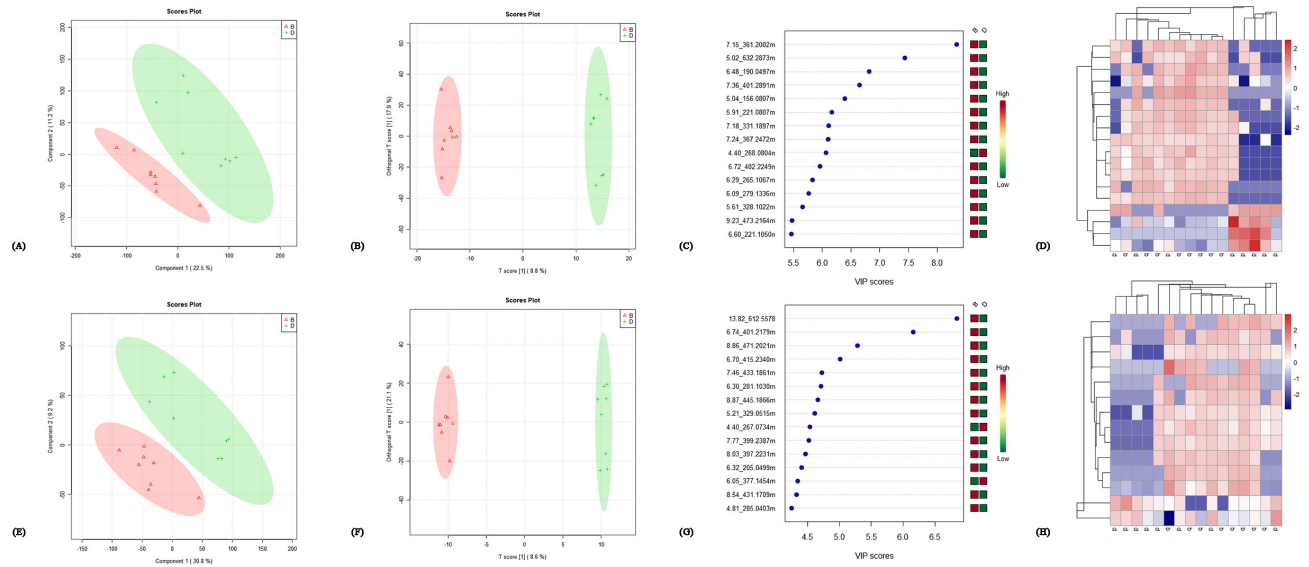

**Figure S6.** PLS-DA, OPLS-DA, VIP scores and cluster diagram analysis results taking D/B; The figures in the first line (A–D) are the analysis results in the positive ion mode, which are, respectively, PLS-DA, OPLS-DA, VIP scores and cluster diagram analysis; the second line (E–H) are the analysis results in the negative ion mode.

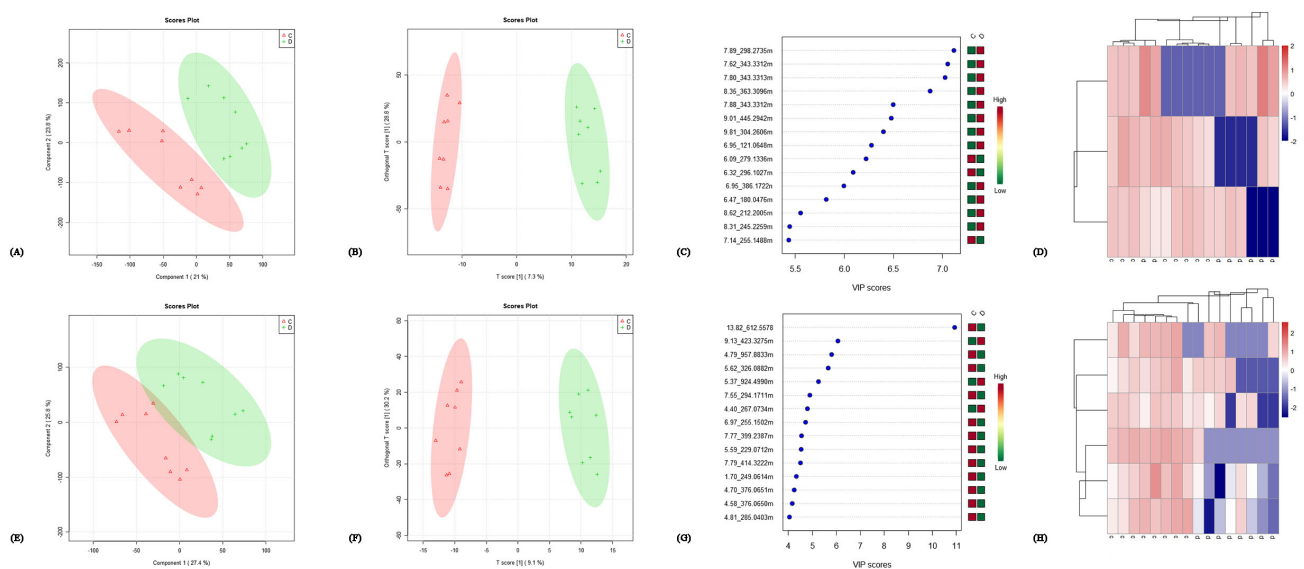

**Figure S7.** PLS-DA, OPLS-DA, VIP scores and cluster diagram analysis results taking D/C; The figures in the first line (A–D) are the analysis results in the positive ion mode, which are, respectively, PLS-DA, OPLS-DA, VIP scores and cluster diagram analysis; the second line (E–H) are the analysis results in the negative ion mode.

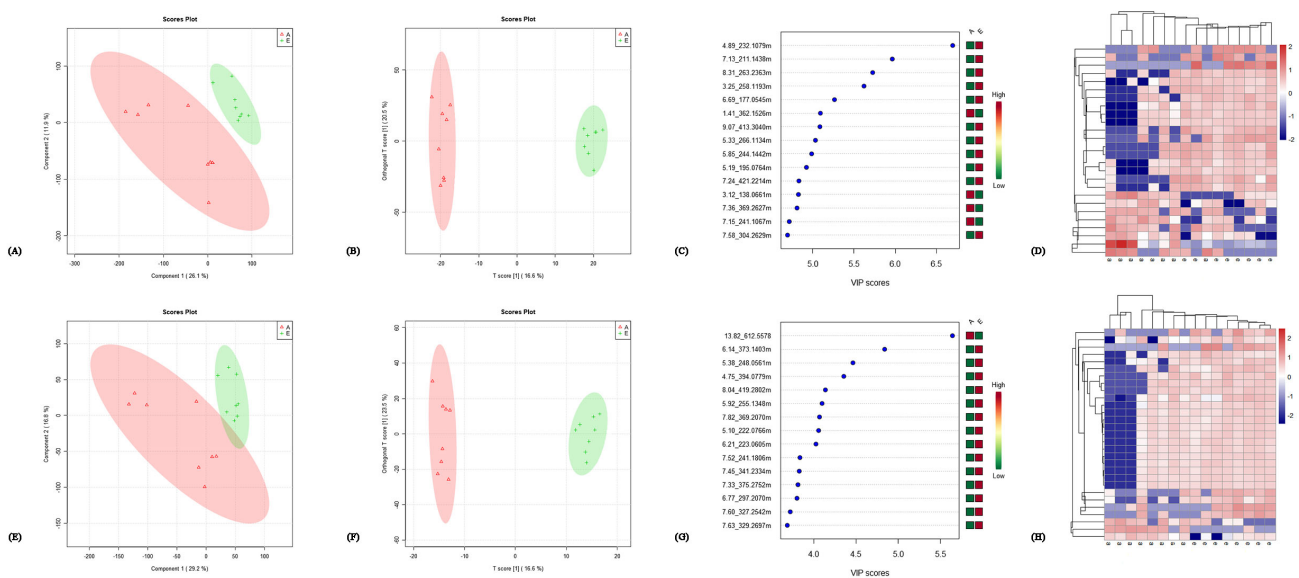

**Figure S8.** PLS-DA, OPLS-DA, VIP scores and cluster diagram analysis results taking E/A; The figures in the first line (A–D) are the analysis results in the positive ion mode, which are, respectively, PLS-DA, OPLS-DA, VIP scores and cluster diagram analysis; the second line (E–H) are the analysis results in the negative ion mode.

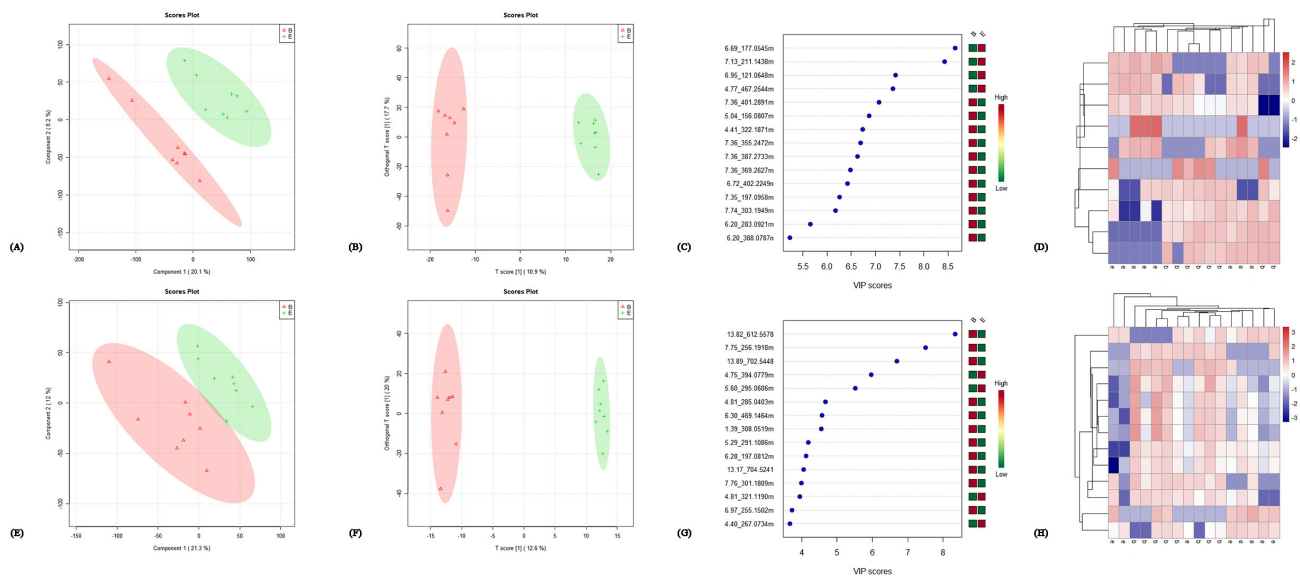

**Figure S9.** PLS-DA, OPLS-DA, VIP scores and cluster diagram analysis results taking E/B; The figures in the first line (A–D) are the analysis results in the positive ion mode, which are, respectively, PLS-DA, OPLS-DA, VIP scores and cluster diagram analysis; the second line (E–H) are the analysis results in the negative ion mode.

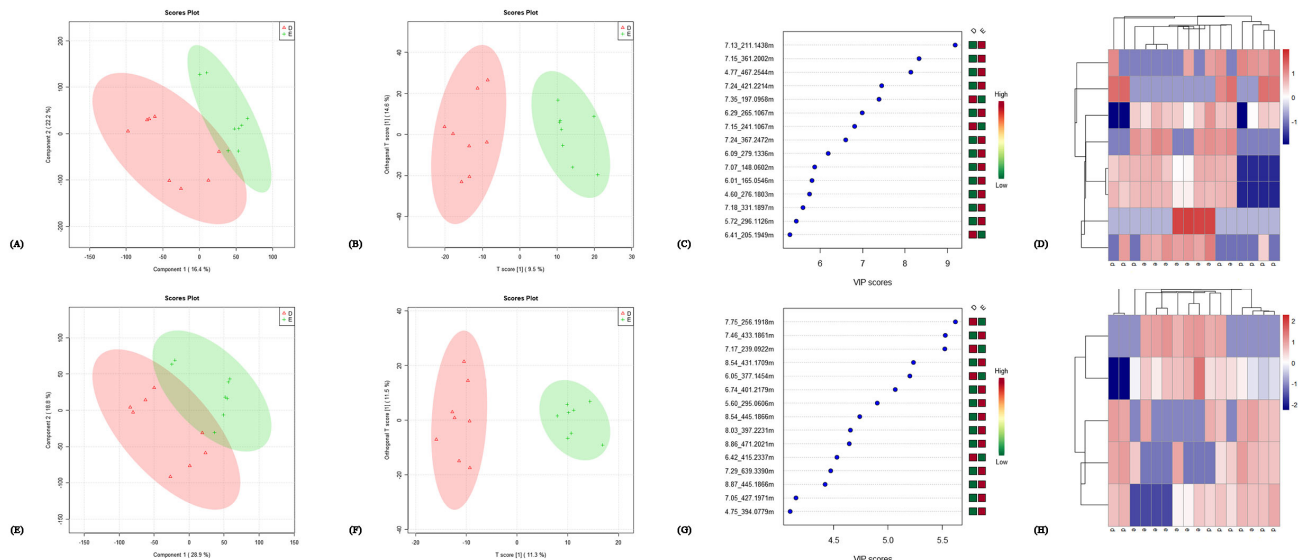

**Figure S10.** PLS-DA, OPLS-DA, VIP scores and cluster diagram analysis results taking E/D; The figures in the first line (A–D) are the analysis results in the positive ion mode, which are, respectively, PLS-DA, OPLS-DA, VIP scores and cluster diagram analysis; the second line (E–H) are the analysis results in the negative ion mode.

**Table S1.** The information of experimental animals.

| <b>No.</b> | <b>Age</b> | <b>Parity</b> | <b>Body condition (1-5)</b> | <b>Applied to LC-MS</b> |
|------------|------------|---------------|-----------------------------|-------------------------|
| 50942      | 7          | 1             | 3                           | Applied                 |
| 50618      | 8          | 2             | 3                           | No-Applied              |
| 40546      | 8          | 2             | 3                           | Applied                 |
| 50606      | 6          | 1             | 2                           | No-Applied              |
| 40548      | 8          | 2             | 2                           | No-Applied              |
| 50632      | 7          | 2             | 2                           | Applied                 |
| 50622      | 6          | 2             | 3                           | No-Applied              |
| 50609      | 6          | 2             | 3                           | No-Applied              |
| 45636      | 5          | 1             | 2                           | Applied                 |
| 47894      | 6          | 1             | 2                           | No-Applied              |
| 50287      | 7          | 1             | 2                           | No-Applied              |
| 48995      | 6          | 1             | 2                           | No-Applied              |
| 56055      | 6          | 1             | 3                           | No-Applied              |
| 52990      | 6          | 1             | 3                           | Applied                 |
| 57058      | 7          | 1             | 2                           | Applied                 |
| 48095      | 6          | 1             | 3                           | No-Applied              |
| 58438      | 6          | 1             | 3                           | No-Applied              |
| 47637      | 5          | 1             | 2                           | No-Applied              |
| 55915      | 8          | 2             | 2                           | Applied                 |
| 51461      | 5          | 1             | 3                           | No-Applied              |
| 42758      | 8          | 2             | 2                           | No-Applied              |
| 58067      | 5          | 1             | 3                           | Applied                 |
| 40567      | 6          | 1             | 2                           | No-Applied              |
| 54080      | 6          | 1             | 3                           | No-Applied              |
| 52864      | 5          | 1             | 3                           | No-Applied              |
| Mean       | 6.36       | 1.32          | 2.52                        | -                       |
| SD         | 1.04       | 0.48          | 0.51                        | -                       |

**Table S2.** The detection results of major serum compounds during LPP.

| GLU (mmol/L) |            |             |             |             |             |
|--------------|------------|-------------|-------------|-------------|-------------|
| No.          | A          | B           | C           | D           | E           |
| 50942        | 3.15       | 3.34        | 3.02        | 2.96        | 2.67        |
| 50618        | 2.77       | 3.04        | 3.02        | 3.81        | 3.54        |
| 40546        | 2.71       | 3.4         | 3.57        | 2.98        | 3.54        |
| 50606        | 3.59       | 2.73        | 2.45        | 1.74        | 4.17        |
| 40548        | 3.38       | 3.34        | 2.14        | 2.98        | 2.69        |
| 50632        | 2.96       | 2.35        | 3.11        | 2.69        | 5.77        |
| 50622        | 3          | 3.36        | 3.53        | 2.38        | 3.02        |
| 50609        | 2.49       | 3.36        | 2.58        | 3.46        | 3.11        |
| 45636        | 2.75       | 2.33        | 3.04        | 3.75        | 4.17        |
| 47894        | 3.38       | 3.3         | 3.66        | 2.98        | 3.38        |
| 50287        | 3.15       | 4.04        | 3.32        | 4.19        | 2.61        |
| 48995        | 2.81       | 3.49        | 3.64        | 3.88        | 3.15        |
| 56055        | 3.28       | 3.02        | 3.74        | 3.84        | 3.44        |
| 52990        | 3.76       | 3           | 2.79        | 2.15        | 3.34        |
| 57058        | 2.54       | 3.17        | 2.9         | 2.32        | 3.52        |
| 48095        | 3.38       | 3.78        | 2.98        | 3.4         | 2.57        |
| 58438        | 3.68       | 3.74        | 2.79        | 2.84        | 3.32        |
| 47637        | 3.59       | 3.89        | 2.77        | 2.59        | 3.21        |
| 55915        | 3.51       | 2.07        | 3.7         | 3.63        | 2.92        |
| 51461        | 3.3        | 2.54        | 3.72        | 4.04        | 3.46        |
| 42758        | 2.73       | 2.5         | 3.7         | 3.69        | 4.79        |
| 58067        | 2.64       | 3.5         | 2.6         | 4.6         | 5.79        |
| 40567        | 4.08       | 3.17        | 3.17        | 3.13        | 3.46        |
| 54080        | 2.45       | 2.63        | 4.79        | 4.35        | 3.63        |
| 52864        | 3.28       | 3.11        | 2.19        | 4.54        | 3.09        |
| Mean         | 3.134      | 3.128       | 3.156       | 3.316       | 3.534       |
| SD           | 0.440      | 0.513       | 0.592       | 0.767       | 0.844       |
| Sig.         | A          | A           | A           | A           | B           |
| Mean±SD      | 3.134±0.44 | 3.128±0.513 | 3.156±0.592 | 3.316±0.767 | 3.534±0.844 |
| TG (mmol/L)  |            |             |             |             |             |
| No.          | A          | B           | C           | D           | E           |
| 50942        | 0.92       | 0.74        | 0.57        | 0.43        | 0.44        |
| 50618        | 0.87       | 0.78        | 0.5         | 0.41        | 0.56        |
| 40546        | 0.83       | 0.8         | 0.48        | 0.63        | 0.55        |
| 50606        | 0.8        | 0.83        | 0.51        | 0.56        | 0.5         |
| 40548        | 0.83       | 0.62        | 0.47        | 0.43        | 0.39        |
| 50632        | 0.92       | 0.91        | 0.5         | 0.45        | 0.45        |
| 50622        | 0.85       | 0.65        | 0.53        | 0.58        | 0.45        |
| 50609        | 0.79       | 0.73        | 0.5         | 0.38        | 0.53        |
| 45636        | 1.16       | 0.52        | 0.53        | 0.5         | 0.46        |
| 47894        | 1.02       | 0.65        | 0.63        | 0.51        | 0.47        |
| 50287        | 0.89       | 0.68        | 0.43        | 0.51        | 0.48        |
| 48995        | 0.8        | 0.65        | 0.5         | 0.55        | 0.42        |
| 56055        | 0.73       | 0.59        | 0.42        | 0.54        | 0.4         |
| 52990        | 0.77       | 0.81        | 0.62        | 0.48        | 0.42        |
| 57058        | 0.67       | 0.76        | 0.52        | 0.36        | 0.39        |
| 48095        | 0.69       | 0.49        | 0.49        | 0.65        | 0.42        |
| 58438        | 0.88       | 0.53        | 0.48        | 0.43        | 0.44        |
| 47637        | 0.7        | 0.54        | 0.55        | 0.48        | 0.41        |

|         |             |             |             |             |             |
|---------|-------------|-------------|-------------|-------------|-------------|
| 55915   | 0.79        | 0.63        | 0.55        | 0.35        | 0.44        |
| 51461   | 0.77        | 0.66        | 0.49        | 0.34        | 0.5         |
| 42758   | 0.74        | 0.55        | 0.58        | 0.44        | 0.44        |
| 58067   | 0.67        | 0.56        | 0.57        | 0.42        | 0.39        |
| 40567   | 0.69        | 0.66        | 0.53        | 0.4         | 0.46        |
| 54080   | 0.67        | 0.73        | 0.52        | 0.46        | 0.39        |
| 52864   | 0.7         | 0.73        | 0.57        | 0.39        | 0.43        |
| Mean    | 0.806       | 0.672       | 0.521       | 0.467       | 0.449       |
| SD      | 0.118       | 0.109       | 0.051       | 0.083       | 0.048       |
| Sig.    | A           | B           | C           | D           | D           |
| Mean±SD | 0.806±0.118 | 0.672±0.109 | 0.521±0.051 | 0.467±0.083 | 0.449±0.048 |

| NEFA (mmol/L) |             |             |             |             |             |
|---------------|-------------|-------------|-------------|-------------|-------------|
| No.           | A           | B           | C           | D           | E           |
| 50942         | 0.52        | 2.86        | 1.76        | 0.58        | 0.45        |
| 50618         | 0.44        | 1.84        | 2.72        | 0.51        | 0.53        |
| 40546         | 0.53        | 1.6         | 2.33        | 0.26        | 0.3         |
| 50606         | 0.4         | 2.11        | 1.98        | 0.21        | 0.53        |
| 40548         | 0.54        | 1.46        | 2.12        | 0.32        | 0.3         |
| 50632         | 0.49        | 1.64        | 1.6         | 0.38        | 0.47        |
| 50622         | 0.47        | 1.23        | 1.75        | 0.6         | 0.64        |
| 50609         | 0.5         | 2.11        | 1.81        | 0.67        | 0.38        |
| 45636         | 0.4         | 2.03        | 1.25        | 0.58        | 0.27        |
| 47894         | 0.51        | 2.65        | 1.31        | 0.55        | 0.42        |
| 50287         | 0.67        | 2.19        | 1.75        | 0.42        | 0.27        |
| 48995         | 0.44        | 1.19        | 1.64        | 0.38        | 0.32        |
| 56055         | 0.49        | 0.94        | 2.18        | 0.37        | 0.61        |
| 52990         | 0.42        | 1.16        | 2.26        | 0.6         | 0.39        |
| 57058         | 0.37        | 2.36        | 2.27        | 0.2         | 0.31        |
| 48095         | 0.41        | 2.39        | 1.36        | 0.23        | 0.27        |
| 58438         | 0.46        | 2.2         | 1.41        | 0.44        | 0.25        |
| 47637         | 0.46        | 2.08        | 1.96        | 0.38        | 0.22        |
| 55915         | 0.49        | 1.85        | 1.72        | 0.31        | 0.45        |
| 51461         | 0.46        | 2.11        | 2.35        | 0.13        | 0.25        |
| 42758         | 0.41        | 1.7         | 1.37        | 0.57        | 0.46        |
| 58067         | 0.43        | 2.92        | 2.75        | 0.37        | 0.2         |
| 40567         | 0.49        | 1.93        | 1.58        | 0.12        | 0.35        |
| 54080         | 0.4         | 2.31        | 1.68        | 0.36        | 0.28        |
| 52864         | 0.44        | 1.24        | 1.8         | 0.18        | 0.27        |
| Mean          | 0.465       | 1.924       | 1.868       | 0.388       | 0.367       |
| SD            | 0.062       | 0.529       | 0.416       | 0.161       | 0.122       |
| Sig.          | A           | B           | B           | A           | A           |
| Mean±SD       | 0.465±0.062 | 1.924±0.529 | 1.868±0.416 | 0.388±0.161 | 0.367±0.122 |

| BHBA (mmol/L) |      |      |      |      |      |
|---------------|------|------|------|------|------|
| No.           | A    | B    | C    | D    | E    |
| 50942         | 1.57 | 2.86 | 2.33 | 0.02 | 0.02 |
| 50618         | 1.63 | 1.84 | 1.98 | 0.03 | 0.02 |
| 40546         | 1.31 | 1.60 | 2.12 | 0.03 | 0.01 |
| 50606         | 1.98 | 2.11 | 1.6  | 0.02 | 0.02 |
| 40548         | 1.47 | 1.46 | 1.75 | 0.02 | 0.02 |
| 50632         | 1.28 | 1.64 | 1.81 | 0.01 | 0.02 |
| 50622         | 1.54 | 1.23 | 1.25 | 0.02 | 0.02 |
| 50609         | 1.60 | 2.11 | 1.31 | 0.02 | 0.01 |



|         |             |            |             |             |             |
|---------|-------------|------------|-------------|-------------|-------------|
| 45636   | 1.82        | 2.03       | 1.75        | 0.02        | 0.02        |
| 47894   | 1.46        | 2.65       | 1.64        | 0.02        | 0.02        |
| 50287   | 1.54        | 2.19       | 2.18        | 0.02        | 0.02        |
| 48995   | 1.68        | 1.19       | 2.26        | 0.03        | 0.01        |
| 56055   | 1.32        | 0.94       | 2.27        | 0.02        | 0.03        |
| 52990   | 1.44        | 1.16       | 1.36        | 0.02        | 0.02        |
| 57058   | 1.79        | 2.36       | 1.41        | 0.01        | 0.02        |
| 48095   | 2.22        | 2.39       | 1.96        | 0.02        | 0.02        |
| 58438   | 1.84        | 2.20       | 3.3         | 0.02        | 0.02        |
| 47637   | 1.79        | 2.08       | 1.72        | 0.01        | 0.02        |
| 55915   | 1.77        | 1.85       | 2.35        | 0.02        | 0.02        |
| 51461   | 1.71        | 2.11       | 1.15        | 0.01        | 0.02        |
| 42758   | 1.62        | 1.70       | 1.37        | 0.01        | 0.01        |
| 58067   | 2.33        | 2.92       | 2.75        | 0.02        | 0.02        |
| 40567   | 1.53        | 1.93       | 2.14        | 0.02        | 0.01        |
| 54080   | 1.08        | 1.76       | 2.31        | 0.02        | 0.02        |
| 52864   | 1.57        | 2.72       | 1.24        | 0.01        | 0.02        |
| Mean    | 1.635       | 1.961      | 1.892       | 0.018       | 0.018       |
| SD      | 0.279       | 0.530      | 0.521       | 0.005       | 0.004       |
| Sig.    | A           | B          | B           | C           | C           |
| Mean±SD | 1.635±0.279 | 1.961±0.53 | 1.892±0.521 | 0.018±0.005 | 0.018±0.004 |

| TP(g/L) |             |            |             |             |             |
|---------|-------------|------------|-------------|-------------|-------------|
| No.     | A           | B          | C           | D           | E           |
| 50942   | 1.87        | 1.51       | 2.89        | 1.97        | 2.08        |
| 50618   | 2.15        | 2.77       | 3.09        | 2.79        | 2.27        |
| 40546   | 0.92        | 2.13       | 2.25        | 3.02        | 2.33        |
| 50606   | 1.83        | 2.79       | 2.83        | 2.56        | 2.16        |
| 40548   | 1.55        | 2.51       | 2.45        | 1.66        | 2.08        |
| 50632   | 1           | 3.05       | 3.51        | 2           | 3.08        |
| 50622   | 1.65        | 3.21       | 2.53        | 1.77        | 0.62        |
| 50609   | 1.75        | 2.09       | 4.24        | 1.54        | 2.41        |
| 45636   | 0.8         | 2.81       | 3.47        | 1.14        | 2.04        |
| 47894   | 2.25        | 1.99       | 2.71        | 0.97        | 2.06        |
| 50287   | 2.49        | 2.49       | 2.65        | 1.45        | 2.56        |
| 48995   | 2.07        | 2.81       | 2.77        | 0.95        | 1.49        |
| 56055   | 1.37        | 3.11       | 3.27        | 0.99        | 2.79        |
| 52990   | 1.16        | 3.07       | 3.35        | 1.56        | 1.47        |
| 57058   | 1.24        | 2.99       | 4.74        | 1.41        | 2.77        |
| 48095   | 0.96        | 2.73       | 4.72        | 0.85        | 1.35        |
| 58438   | 2.81        | 2.29       | 3.33        | 2.12        | 2.02        |
| 47637   | 1.39        | 2.31       | 3.96        | 1.6         | 1.35        |
| 55915   | 0.98        | 2.04       | 2.87        | 2.12        | 1.83        |
| 51461   | 1.18        | 2.06       | 3.61        | 2.85        | 1.41        |
| 42758   | 1.75        | 2.37       | 2.87        | 1.66        | 1.12        |
| 58067   | 1.75        | 2.09       | 3.65        | 1.91        | 0.82        |
| 40567   | 1.79        | 2.25       | 3.09        | 1.18        | 1.54        |
| 54080   | 2.01        | 2          | 3.51        | 1.14        | 2.06        |
| 52864   | 1.93        | 2.41       | 3.03        | 0.82        | 2.16        |
| Mean    | 1.626       | 2.475      | 3.255       | 1.681       | 1.914       |
| SD      | 0.522       | 0.440      | 0.648       | 0.637       | 0.611       |
| Sig.    | A           | B          | C           | A           | A           |
| Mean±SD | 1.626±0.522 | 2.475±0.44 | 3.255±0.648 | 1.681±0.637 | 1.914±0.611 |

| E <sub>2</sub> (nmol/L) |             |           |            |            |             |
|-------------------------|-------------|-----------|------------|------------|-------------|
| No.                     | A           | B         | C          | D          | E           |
| 50942                   | 0.27        | 0.21      | 0.17       | 0.22       | 0.17        |
| 50618                   | 0.21        | 0.38      | 0.5        | 0.16       | 0.16        |
| 40546                   | 0.25        | 0.13      | 0.42       | 0.19       | 0.22        |
| 50606                   | 0.35        | 0.28      | 0.29       | 0.21       | 0.22        |
| 40548                   | 0.44        | 0.2       | 0.27       | 0.22       | 0.23        |
| 50632                   | 0.07        | 0.35      | 0.12       | 0.24       | 0.25        |
| 50622                   | 0.19        | 0.46      | 0.19       | 0.18       | 0.14        |
| 50609                   | 0.26        | 0.36      | 0.19       | 0.19       | 0.15        |
| 45636                   | 0.37        | 0.34      | 0.2        | 0.19       | 0.15        |
| 47894                   | 0.4         | 0.45      | 0.41       | 0.16       | 0.15        |
| 50287                   | 0.38        | 0.42      | 0.27       | 0.12       | 0.15        |
| 48995                   | 0.18        | 0.42      | 0.59       | 0.11       | 0.16        |
| 56055                   | 0.05        | 0.36      | 0.35       | 0.17       | 0.11        |
| 52990                   | 0.14        | 0.31      | 0.46       | 0.15       | 0.17        |
| 57058                   | 0.16        | 0.32      | 0.49       | 0.11       | 0.23        |
| 48095                   | 0.17        | 0.3       | 0.65       | 0.16       | 0.19        |
| 58438                   | 0.33        | 0.33      | 0.27       | 0.16       | 0.14        |
| 47637                   | 0.15        | 0.25      | 0.14       | 0.2        | 0.16        |
| 55915                   | 0.07        | 0.23      | 0.5        | 0.31       | 0.15        |
| 51461                   | 0.18        | 0.24      | 0.41       | 0.26       | 0.15        |
| 42758                   | 0.27        | 0.32      | 0.42       | 0.17       | 0.12        |
| 58067                   | 0.31        | 0.37      | 0.16       | 0.19       | 0.12        |
| 40567                   | 0.36        | 0.35      | 0.17       | 0.14       | 0.16        |
| 54080                   | 0.13        | 0.29      | 0.28       | 0.16       | 0.17        |
| 52864                   | 0.23        | 0.35      | 0.23       | 0.15       | 0.2         |
| Mean                    | 0.236       | 0.320     | 0.326      | 0.180      | 0.168       |
| SD                      | 0.109       | 0.080     | 0.150      | 0.045      | 0.037       |
| <i>P</i>                | A           | B         | B          | C          | C           |
| Mean±SD                 | 0.236±0.109 | 0.32±0.08 | 0.326±0.15 | 0.18±0.045 | 0.168±0.037 |

  

| P <sub>4</sub> (nmol/L) |      |      |      |      |      |
|-------------------------|------|------|------|------|------|
| No.                     | A    | B    | C    | D    | E    |
| 50942                   | 2.08 | 0.75 | 1.16 | 1.42 | 1.24 |
| 50618                   | 2.13 | 3.23 | 1.44 | 3.25 | 1.58 |
| 40546                   | 2.99 | 1.01 | 1.03 | 1.92 | 2.11 |
| 50606                   | 3.05 | 0.88 | 0.73 | 1.85 | 1.49 |
| 40548                   | 2.6  | 1.63 | 0.73 | 1.19 | 1.8  |
| 50632                   | 1.16 | 0.79 | 3.1  | 1.5  | 1.81 |
| 50622                   | 1.91 | 3.36 | 2.13 | 1.15 | 1.5  |
| 50609                   | 1.83 | 1.09 | 1.63 | 1.51 | 1.89 |
| 45636                   | 1.46 | 1.7  | 1.93 | 2.39 | 1.53 |
| 47894                   | 1.76 | 1.7  | 1.33 | 1.62 | 1.84 |
| 50287                   | 2.06 | 1.67 | 0.51 | 2.35 | 1.68 |
| 48995                   | 3.59 | 2.06 | 0.49 | 2.55 | 1.68 |
| 56055                   | 1.72 | 1.65 | 1.07 | 2.4  | 1.5  |
| 52990                   | 2.82 | 1.2  | 1.42 | 1.67 | 1.58 |
| 57058                   | 1.57 | 2.95 | 1.33 | 1.45 | 2.76 |
| 48095                   | 2.58 | 1.44 | 2.08 | 2.4  | 1.74 |
| 58438                   | 1.57 | 1.65 | 2.11 | 1.55 | 3.33 |
| 47637                   | 0.86 | 1.07 | 1.42 | 1.49 | 1.73 |
| 55915                   | 0.77 | 2.23 | 2.32 | 1.69 | 1.82 |

|          |            |             |             |             |             |
|----------|------------|-------------|-------------|-------------|-------------|
| 51461    | 0.49       | 2.58        | 1.01        | 1.31        | 1.11        |
| 42758    | 0.96       | 0.98        | 0.45        | 1.81        | 1.61        |
| 58067    | 2.34       | 1.95        | 2.45        | 3.05        | 1.31        |
| 40567    | 1.7        | 1.95        | 2.32        | 1.79        | 1.72        |
| 54080    | 1.05       | 2.13        | 0.47        | 1.6         | 1.61        |
| 52864    | 0.7        | 2.84        | 1.44        | 1           | 1.15        |
| Mean     | 1.830      | 1.779       | 1.444       | 1.836       | 1.724       |
| SD       | 0.811      | 0.758       | 0.713       | 0.575       | 0.467       |
| <i>P</i> | A          | AB          | B           | A           | AB          |
| Mean±SD  | 1.83±0.811 | 1.779±0.758 | 1.444±0.713 | 1.836±0.575 | 1.724±0.467 |

| FSH (ug/L) |             |             |             |             |             |
|------------|-------------|-------------|-------------|-------------|-------------|
| No.        | A           | B           | C           | D           | E           |
| 50942      | 5.42        | 0.83        | 3.03        | 5.58        | 5.19        |
| 50618      | 3.95        | 9.93        | 1.19        | 7.44        | 6.71        |
| 40546      | 5.7         | 5.7         | 5.42        | 7.64        | 4.8         |
| 50606      | 2.67        | 5.15        | 4.23        | 6.29        | 5.53        |
| 40548      | 2.3         | 6.25        | 1.19        | 5.09        | 5.68        |
| 50632      | 9.38        | 3.86        | 7.17        | 5.48        | 9.85        |
| 50622      | 7.08        | 1.1         | 3.03        | 7.05        | 5.65        |
| 50609      | 3.77        | 0.74        | 2.76        | 7.3         | 6.24        |
| 45636      | 1.1         | 3.31        | 2.94        | 7           | 6.02        |
| 47894      | 5.06        | 0.09        | 4.32        | 6.46        | 7.22        |
| 50287      | 2.3         | 8           | 3.31        | 4.99        | 5.07        |
| 48995      | 1.29        | 0.28        | 5.33        | 9.4         | 6.27        |
| 56055      | 2.67        | 2.48        | 6.53        | 5.88        | 6.49        |
| 52990      | 2.94        | 1.56        | 1.75        | 7.03        | 5.58        |
| 57058      | 3.03        | 3.4         | 2.21        | 5.73        | 7.2         |
| 48095      | 4.04        | 2.57        | 2.3         | 6.05        | 6.86        |
| 58438      | 7.26        | 4.5         | 5.97        | 5.53        | 8.25        |
| 47637      | 6.62        | 5.43        | 6.62        | 4.92        | 6.83        |
| 55915      | 6.62        | 6.39        | 3.68        | 6.63        | 6.14        |
| 51461      | 7.26        | 4.36        | 4.6         | 7.44        | 5.16        |
| 42758      | 5.43        | 8.23        | 7.72        | 4.85        | 6.95        |
| 58067      | 5.29        | 6.34        | 4.04        | 7.96        | 6.29        |
| 40567      | 5.53        | 5.97        | 5.02        | 6.1         | 5.78        |
| 54080      | 5.16        | 5.12        | 4.38        | 6.66        | 5.09        |
| 52864      | 5.21        | 5.61        | 5.48        | 5.53        | 7.27        |
| Mean       | 4.683       | 4.288       | 4.168       | 6.401       | 6.324       |
| SD         | 2.079       | 2.637       | 1.826       | 1.109       | 1.122       |
| <i>P</i>   | A           | A           | A           | B           | B           |
| Mean±SD    | 4.683±2.079 | 4.288±2.637 | 4.168±1.826 | 6.401±1.109 | 6.324±1.122 |

| LH (ng/ml) |      |      |      |      |      |
|------------|------|------|------|------|------|
| No.        | A    | B    | C    | D    | E    |
| 50942      | 0.03 | 0.06 | 0.07 | 0.05 | 0.12 |
| 50618      | 0.09 | 0.09 | 0.06 | 0.09 | 0.12 |
| 40546      | 0.09 | 0.09 | 0.06 | 0.08 | 0.07 |
| 50606      | 0.06 | 0.04 | 0.07 | 0.11 | 0.09 |
| 40548      | 0.03 | 0.06 | 0.06 | 0.1  | 0.08 |
| 50632      | 0.04 | 0.03 | 0.06 | 0.13 | 0.15 |
| 50622      | 0.04 | 0.14 | 0.09 | 0.09 | 0.05 |
| 50609      | 0.03 | 0.04 | 0.07 | 0.05 | 0.06 |
| 45636      | 0.06 | 0.05 | 0.08 | 0.07 | 0.1  |

|          |            |            |            |            |             |
|----------|------------|------------|------------|------------|-------------|
| 47894    | 0.12       | 0.06       | 0.08       | 0.09       | 0.1         |
| 50287    | 0.04       | 0.09       | 0.06       | 0.09       | 0.11        |
| 48995    | 0.09       | 0.04       | 0.08       | 0.08       | 0.1         |
| 56055    | 0.08       | 0.1        | 0.03       | 0.07       | 0.11        |
| 52990    | 0.08       | 0.1        | 0.08       | 0.09       | 0.11        |
| 57058    | 0.06       | 0.14       | 0.08       | 0.09       | 0.09        |
| 48095    | 0.05       | 0.05       | 0.08       | 0.1        | 0.07        |
| 58438    | 0.08       | 0.04       | 0.09       | 0.13       | 0.11        |
| 47637    | 0.06       | 0.05       | 0.09       | 0.14       | 0.07        |
| 55915    | 0.03       | 0.11       | 0.08       | 0.07       | 0.04        |
| 51461    | 0.07       | 0.05       | 0.06       | 0.14       | 0.07        |
| 42758    | 0.04       | 0.1        | 0.06       | 0.04       | 0.09        |
| 58067    | 0.02       | 0.07       | 0.08       | 0.03       | 0.09        |
| 40567    | 0.04       | 0.05       | 0.08       | 0.04       | 0.11        |
| 54080    | 0.11       | 0.06       | 0.08       | 0.07       | 0.1         |
| 52864    | 0.06       | 0.08       | 0.04       | 0.09       | 0.12        |
| Mean     | 0.060      | 0.071      | 0.070      | 0.085      | 0.093       |
| SD       | 0.026      | 0.030      | 0.014      | 0.030      | 0.025       |
| <i>P</i> | A          | AB         | AB         | BC         | C           |
| Mean±SD  | 0.06±0.026 | 0.071±0.03 | 0.07±0.014 | 0.085±0.03 | 0.093±0.025 |

**Table S3.** Qualitative results of differential metabolites.

| HMDB_ID     | Description                                         | m/z      | Retention time (min) | UP or DOWN |      |
|-------------|-----------------------------------------------------|----------|----------------------|------------|------|
| HMDB0000157 | Hypoxanthine                                        | 137.0457 | 3.181367             | B/A        | DOWN |
| HMDB0000195 | Inosine                                             | 291.0696 | 4.3967               | D/B        | DOWN |
| HMDB0000205 | 2-Oxo-3-phenylpropanoic acid (Mixture oxo and keto) | 165.0546 | 6.00885              | E/D        | UP   |
| HMDB0000477 | 7Z,10Z-Hexadecadienoic acid                         | 297.207  | 6.766433             | E/A        | DOWN |
| HMDB0000552 | 3-Methylglutaryl carnitine                          | 290.1594 | 5.221317             | E/A        | DOWN |
| HMDB0000759 | Glycylleucine                                       | 189.1234 | 1.53895              | D/A        | UP   |
|             |                                                     |          |                      | E/A        | UP   |
| HMDB0000942 | Tetrahydroneopterin                                 | 258.1193 | 3.248                | B/A        | DOWN |
|             |                                                     |          |                      | E/A        | UP   |
| HMDB0000949 | Tetrahydrocortisol                                  | 367.2472 | 7.235                | D/B        | UP   |
| HMDB0000969 | 1,25-Dihydroxyvitamin D3-26,23-lactone              | 445.2942 | 9.014483             | C/B        | DOWN |
| HMDB0001049 | Gamma-Glutamylcysteine                              | 295.0606 | 5.5979               | E/B        | UP   |
| HMDB0001125 | Inositol cyclic phosphate                           | 287.0166 | 5.014633             | E/A        | UP   |
| HMDB0001867 | 4-Aminohippuric acid                                | 195.0764 | 5.188733             | C/A        | DOWN |
| HMDB0001896 | 5-Methoxytryptophol                                 | 192.1018 | 6.608033             | E/C        | DOWN |
| HMDB0001929 | Levofloxacin                                        | 362.1526 | 1.41285              | E/A        | DOWN |
| HMDB0002689 | 13,14-Dihydro PGE1                                  | 357.263  | 6.837917             | C/A        | UP   |
|             |                                                     |          |                      | D/A        | DOWN |
| HMDB0003040 | Arabinosylhypoxanthine                              | 267.0734 | 4.40185              | D/B        | DOWN |
| HMDB0003339 | D-Glutamic acid                                     | 148.0602 | 7.069733             | D/B        | UP   |
| HMDB0004049 | 20-Hydroxy-PGF2a                                    | 415.234  | 6.696883             | D/B        | UP   |
| HMDB0004198 | Reduced Vitamin K (phylloquinone)                   | 449.3425 | 10.68177             | E/A        | DOWN |
| HMDB0004667 | 13S-hydroxyoctadecadienoic acid                     | 341.2334 | 7.452883             | D/A        | DOWN |
| HMDB0005821 | Beta-Cortol                                         | 369.2627 | 7.36205              | E/A        | UP   |
| HMDB0006045 | Dityrosine                                          | 361.139  | 5.788133             | C/A        | UP   |
| HMDB0006372 | L-Glyceric acid                                     | 151.0249 | 3.89215              | D/B        | UP   |
| HMDB0006469 | Linoleyl carnitine                                  | 424.3413 | 6.948333             | B/A        | DOWN |
| HMDB0006940 | 9(S)-HPODE                                          | 357.2282 | 7.299417             | D/A        | DOWN |
|             |                                                     |          |                      | D/B        | DOWN |
| HMDB0007931 | PC(14:1(9Z)/P-18:1(9Z))                             | 712.5291 | 13.15612             | E/C        | DOWN |
|             |                                                     |          |                      | C/A        | UP   |
| HMDB0007961 | PC(15:0/P-16:0)                                     | 702.5448 | 13.88853             | E/B        | DOWN |
|             |                                                     |          |                      | E/C        | DOWN |
|             |                                                     |          |                      | D/C        | DOWN |
| HMDB0008064 | PC(18:1(11Z)/14:0)                                  | 730.54   | 13.63198             | E/A        | DOWN |
|             |                                                     |          |                      | E/B        | DOWN |
|             |                                                     |          |                      | E/C        | DOWN |
| HMDB0008394 | PC(20:3(8Z,11Z,14Z)/14:0)                           | 754.5395 | 13.15612             | D/C        | DOWN |
|             |                                                     |          |                      | E/C        | DOWN |
| HMDB0008850 | PE(14:0/P-16:0)                                     | 646.4823 | 11.96288             | C/A        | UP   |
|             |                                                     |          |                      | E/A        | DOWN |
| HMDB0008892 | PE(15:0/18:0)                                       | 704.5241 | 13.16865             | E/C        | DOWN |
|             |                                                     |          |                      | E/D        | DOWN |
| HMDB0008916 | PE(15:0/P-16:0)                                     | 706.5183 | 12.73318             | E/C        | DOWN |
| HMDB0009048 | PE(18:1(11Z)/P-16:0)                                | 700.5291 | 13.60697             | D/C        | DOWN |
|             |                                                     |          |                      | E/C        | DOWN |
| HMDB0009378 | PE(20:3(8Z,11Z,14Z)/P-16:0)                         | 724.5291 | 13.25757             | E/C        | DOWN |

| HMDB_ID     | Description                              | m/z      | Retention time (min) | UP or DOWN |      |
|-------------|------------------------------------------|----------|----------------------|------------|------|
| HMDB0010166 | PS(18:0/22:5(7Z,10Z,13Z,16Z,19Z))        | 838.5559 | 9.232483             | C/A        | UP   |
|             |                                          |          |                      | E/A        | UP   |
| HMDB0010316 | Acetaminophen glucuronide                | 326.0882 | 5.619233             | D/B        | UP   |
|             |                                          |          |                      | E/B        | DOWN |
| HMDB0010569 | PE-NMe(16:0/18:1(9Z))                    | 730.5396 | 13.3909              | E/C        | DOWN |
|             |                                          |          |                      | B/A        | UP   |
| HMDB0010730 | 3-Oxotetradecanoic acid                  | 241.1806 | 7.517267             | E/C        | DOWN |
|             |                                          |          |                      | E/C        | DOWN |
| HMDB0011386 | PE(P-18:0/20:4(8Z,11Z,14Z,17Z))          | 750.5448 | 13.94273             | E/C        | DOWN |
|             |                                          |          |                      | E/C        | DOWN |
| HMDB0011401 | PE(P-18:1(11Z)/14:0)                     | 672.4979 | 12.35693             | E/C        | DOWN |
|             |                                          |          |                      | E/C        | DOWN |
| HMDB0011403 | PE(P-18:1(11Z)/15:0)                     | 686.5132 | 12.74393             | E/C        | DOWN |
|             |                                          |          |                      | E/C        | DOWN |
| HMDB0011416 | PE(P-18:1(11Z)/20:3(5Z,8Z,11Z))          | 750.5444 | 13.40813             | E/C        | DOWN |
|             |                                          |          |                      | D/C        | DOWN |
| HMDB0011760 | Cer(d18:0/16:0)                          | 584.5262 | 12.75997             | D/A        | DOWN |
|             |                                          |          |                      | D/B        | DOWN |
|             | Cer(d18:0/18:0)                          | 612.5578 | 13.82073             | D/C        | DOWN |
|             |                                          |          |                      | E/A        | DOWN |
|             |                                          |          |                      | E/B        | DOWN |
|             |                                          |          |                      | E/C        | DOWN |
|             | Cer(d18:0/18:1(9Z))                      | 610.5417 | 13.26915             | D/C        | DOWN |
|             |                                          |          |                      | E/C        | DOWN |
| HMDB0013208 | 9-Hexadecenoylcholine                    | 363.3096 | 8.3496               | D/C        | DOWN |
|             |                                          |          |                      | E/A        | DOWN |
| HMDB0013246 | Margaroylglycine                         | 372.2753 | 7.47975              | D/A        | DOWN |
|             |                                          |          |                      | D/C        | DOWN |
| HMDB0013331 | 3, 5-Tetradecadiencarnitine              | 368.2791 | 6.624133             | D/A        | DOWN |
|             |                                          |          |                      | D/A        | DOWN |
| HMDB0013648 | Palmitoleoyl Ethanolamide                | 298.2735 | 7.889533             | D/A        | DOWN |
|             |                                          |          |                      | C/A        | DOWN |
| HMDB0013973 | 5-Hydroxymethyl tolterodine              | 386.2337 | 8.337483             | E/B        | DOWN |
|             |                                          |          |                      | D/A        | UP   |
| HMDB0014353 | Ticlopidine                              | 308.0519 | 1.385783             | D/B        | UP   |
|             |                                          |          |                      | E/A        | DOWN |
| HMDB0014727 | Lisuride                                 | 361.2002 | 7.149583             | E/A        | UP   |
|             |                                          |          |                      | D/A        | UP   |
| HMDB0015086 | Isoniazid                                | 138.0661 | 3.120233             | E/A        | DOWN |
|             |                                          |          |                      | D/A        | UP   |
| HMDB0015133 | Frovatriptan                             | 244.1442 | 5.852083             | E/A        | UP   |
|             |                                          |          |                      | D/A        | DOWN |
| HMDB0015330 | Tubocurarine                             | 632.2873 | 5.022317             | D/B        | DOWN |
|             |                                          |          |                      | D/A        | DOWN |
| HMDB0015377 | Isocarboxazid                            | 232.1079 | 4.89115              | E/A        | UP   |
|             |                                          |          |                      | B/A        | DOWN |
| HMDB0015668 | Gestodene                                | 355.1917 | 8.654433             | C/A        | DOWN |
|             |                                          |          |                      | C/A        | UP   |
| HMDB0028716 | Arginyl-Phenylalanine                    | 322.1871 | 4.41275              | C/A        | UP   |
|             |                                          |          |                      | C/A        | DOWN |
| HMDB0029081 | Tryptophyl-Glutamine                     | 377.1454 | 6.04845              | D/A        | DOWN |
|             |                                          |          |                      | E/D        | UP   |
| HMDB0029112 | Tyrosyl-Phenylalanine                    | 373.1403 | 6.138767             | E/A        | DOWN |
|             |                                          |          |                      | D/C        | DOWN |
| HMDB0029638 | 4-Methylbenzaldehyde                     | 121.0648 | 6.953567             | D/C        | DOWN |
|             |                                          |          |                      | C/A        | DOWN |
| HMDB0029838 | Harmalol                                 | 199.087  | 5.10765              | E/A        | DOWN |
|             |                                          |          |                      | E/C        | DOWN |
| HMDB0030254 | propanoic acid                           | 241.1067 | 7.149583             | E/D        | DOWN |
|             |                                          |          |                      | C/A        | UP   |
| HMDB0030492 | Spirolide B                              | 694.4645 | 8.854283             | C/B        | DOWN |
|             |                                          |          |                      | B/C        | DOWN |
| HMDB0030686 | Cyclointegrin                            | 369.1331 | 7.2136               | C/A        | UP   |
|             |                                          |          |                      |            |      |
| HMDB0030903 | 3-(4-Methylphenyl)oxiranecarboxylic acid | 223.0605 | 6.208817             |            |      |
|             |                                          |          |                      |            |      |

| HMDB_ID     | Description                                                          | m/z      | Retention<br>time (min) | UP or DOWN |      |
|-------------|----------------------------------------------------------------------|----------|-------------------------|------------|------|
|             |                                                                      |          |                         | D/A        | UP   |
|             |                                                                      |          |                         | E/A        | UP   |
| HMDB0031048 | Avocadyne 1-acetate                                                  | 371.2437 | 7.373383                | D/B        | UP   |
| HMDB0031054 | 10-Hydroxy-2,8-decadiene-4,6-diynoic acid                            | 177.0545 | 6.693783                | D/B        | DOWN |
| HMDB0031486 | 3-Hepten-2-one                                                       | 113.0964 | 5.027767                | D/A        | DOWN |
|             |                                                                      |          |                         | E/A        | DOWN |
| HMDB0031929 | Zanthodioline                                                        | 304.1191 | 6.50105                 | C/A        | UP   |
| HMDB0031972 | Heliespirone A                                                       | 265.1432 | 6.7421                  | E/A        | UP   |
| HMDB0032240 | N-3,7-Dimethyl-2,6-octadienylcyclopropylcarboxamide                  | 222.1851 | 6.019817                | E/A        | DOWN |
| HMDB0032662 | (S)-9-Hydroxy-10-undecenoic acid                                     | 401.2891 | 7.36205                 | D/B        | UP   |
| HMDB0032864 | Mycotoxin T 2                                                        | 342.1541 | 5.809383                | E/A        | DOWN |
| HMDB0033123 | 4-Phenylpyridine                                                     | 156.0807 | 5.0441                  | D/B        | UP   |
|             |                                                                      |          |                         | E/B        | UP   |
|             |                                                                      |          |                         | B/A        | DOWN |
| HMDB0033433 | (S)-Homostachydrine                                                  | 180.0991 | 2.297217                | C/A        | DOWN |
|             |                                                                      |          |                         | D/A        | DOWN |
|             |                                                                      |          |                         | E/A        | DOWN |
|             |                                                                      |          |                         | E/A        | UP   |
| HMDB0033512 | Gonyautoxin VI                                                       | 394.0779 | 4.753167                | E/B        | UP   |
|             |                                                                      |          |                         | E/C        | UP   |
| HMDB0033643 | 10-Hydroxy-8-nor-2-fenchanone glucoside                              | 361.1507 | 6.686133                | D/A        | DOWN |
| HMDB0034056 | 5-(3,4-Methylenedioxyphenyl)pentanoic acid                           | 223.0964 | 5.509367                | D/A        | DOWN |
| HMDB0034206 | Ethyl 4-methylphenoxyacetate                                         | 239.0922 | 7.171183                | C/A        | UP   |
| HMDB0034276 | L,L-Cyclo(leucylprolyl)                                              | 255.1348 | 5.923983                | D/A        | UP   |
|             |                                                                      |          |                         | E/A        | UP   |
| HMDB0034293 | Asperagenin                                                          | 447.3113 | 8.166317                | E/A        | UP   |
| HMDB0034672 | (5alpha,8beta,9beta)-5,9-Epoxy-3,6-megastigmadien-8-ol               | 417.2992 | 8.009933                | E/C        | UP   |
| HMDB0034881 | 3-Carboxy-2,3,4,9-tetrahydro-1H-pyrido[3,4-b]indole-1-propanoic acid | 289.118  | 5.04955                 | B/A        | DOWN |
|             |                                                                      |          |                         | E/A        | UP   |
| HMDB0035404 | Isogingerenone B                                                     | 387.1795 | 6.953567                | E/C        | DOWN |
| HMDB0035571 | 4,6-Heneicosanedione                                                 | 325.3096 | 9.349667                | E/A        | UP   |
|             |                                                                      |          |                         | E/A        | DOWN |
| HMDB0035779 | Armillane                                                            | 421.2214 | 7.235                   | E/C        | DOWN |
|             |                                                                      |          |                         | E/D        | DOWN |
| HMDB0036006 | Xanthopurpurin                                                       | 285.0403 | 4.811733                | D/B        | UP   |
|             |                                                                      |          |                         | E/B        | DOWN |
|             |                                                                      |          |                         | C/A        | DOWN |
| HMDB0036021 | Rhubafuran                                                           | 221.1178 | 6.936767                | C/B        | DOWN |
|             |                                                                      |          |                         | E/C        | UP   |
| HMDB0036031 | Labienoxime                                                          | 254.176  | 7.522583                | B/A        | DOWN |
| HMDB0036093 | Absciscic acid                                                       | 263.1288 | 7.144533                | B/A        | DOWN |
| HMDB0036195 | N,2,3-Trimethyl-2-(1-methylethyl)butanamide                          | 343.3312 | 7.615833                | D/A        | DOWN |
| HMDB0036731 | beta-Neoclovene                                                      | 205.1949 | 7.069733                | C/B        | DOWN |
|             |                                                                      |          |                         | E/C        | UP   |
| HMDB0036756 | (ent-6alpha,7alpha,16alphaH)-6,7,17-Trihydroxy-19-kauranoic acid     | 397.2231 | 8.027517                | D/A        | UP   |
|             |                                                                      |          |                         | D/B        | UP   |
|             |                                                                      |          |                         | E/D        | UP   |
|             |                                                                      |          |                         | C/A        | DOWN |
| HMDB0037028 | Deoxyloganic acid                                                    | 383.1309 | 5.67545                 | C/B        | DOWN |
|             |                                                                      |          |                         | D/A        | DOWN |
|             |                                                                      |          |                         | E/C        | UP   |

| HMDB_ID     | Description                                              | m/z      | Retention time (min) | UP or DOWN |      |
|-------------|----------------------------------------------------------|----------|----------------------|------------|------|
| HMDB0037519 | 2-(5,8-Tetradecadienyl)cyclobutanone                     | 263.2363 | 8.31305              | D/A        | DOWN |
|             |                                                          |          |                      | E/A        | UP   |
| HMDB0037834 | Ethyl menthane carboxamide                               | 256.1918 | 7.7502               | E/B        | DOWN |
|             |                                                          |          |                      | E/D        | DOWN |
| HMDB0038057 | Dehydrophytosphingosine                                  | 316.284  | 7.910517             | B/A        | DOWN |
|             |                                                          |          |                      | E/A        | DOWN |
| HMDB0038128 | Sphaerosin                                               | 605.2361 | 4.697667             | E/C        | DOWN |
| HMDB0038522 | 2-(10-Heptadecenyl)-6-hydroxybenzoic acid                | 419.2802 | 8.038183             | D/A        | DOWN |
| HMDB0038523 | Methyl 2-(10-heptadecenyl)-6-hydroxybenzoate             | 433.2961 | 8.048783             | E/C        | UP   |
| HMDB0038630 | Niazimin A                                               | 382.1507 | 5.983567             | E/D        | UP   |
|             |                                                          |          |                      | E/C        | DOWN |
| HMDB0038794 | 2,12-Epoxy-7(14)-illudadiene-3,8-diol                    | 249.1482 | 5.719267             | E/D        | DOWN |
|             |                                                          |          |                      | C/A        | DOWN |
|             |                                                          |          |                      | C/B        | DOWN |
| HMDB0039155 | ar-Artemisene                                            | 271.2413 | 7.884267             | D/A        | DOWN |
|             |                                                          |          |                      | E/A        | DOWN |
|             |                                                          |          |                      | E/B        | DOWN |
| HMDB0040033 | 2-Heptylbenzothiazole                                    | 467.2544 | 4.769417             | E/B        | DOWN |
|             |                                                          |          |                      | E/D        | DOWN |
|             |                                                          |          |                      | B/A        | DOWN |
| HMDB0040045 | 5-[2H-Pyrrol-4-(3H)-ylidenemethyl]-2-furanmethanol       | 222.0766 | 5.102183             | D/A        | UP   |
|             |                                                          |          |                      | E/A        | UP   |
| HMDB0040694 | Agarital                                                 | 266.1134 | 5.32935              | C/A        | UP   |
| HMDB0040768 | N-(2,5-Dihydroxyphenyl)pyridinium(1+)                    | 377.1508 | 4.42895              | E/C        | DOWN |
| HMDB0040972 | 1-Methoxy-1H-indole-3-carboxaldehyde                     | 176.0705 | 4.3062               | E/A        | DOWN |
| HMDB0041787 | Urolithin B 3-O-glucuronide                              | 389.086  | 6.203733             | E/B        | UP   |
| HMDB0043117 | TG(15:0/22:0/22:1(13Z))                                  | 957.8833 | 4.78875              | C/A        | UP   |
|             |                                                          |          |                      | C/A        | UP   |
| HMDB0059631 | Cis-stilbene oxide                                       | 197.0958 | 7.34645              | E/B        | DOWN |
|             |                                                          |          |                      | E/C        | DOWN |
|             |                                                          |          |                      | E/D        | DOWN |
| HMDB0059856 | Ethyl 2-pyrrolicarboxylate                               | 279.1336 | 6.08525              | D/B        | DOWN |
|             |                                                          |          |                      | D/C        | DOWN |
| HMDB0060107 | (5Z,9E,12S,14Z)-8,11,12-Trihydroxyicosa-5,9,14-trienoate | 355.2472 | 7.36205              | C/B        | DOWN |
|             |                                                          |          |                      | E/B        | UP   |
| HMDB0060484 | Indolepyruvate                                           | 248.0561 | 5.382483             | E/A        | UP   |
| HMDB0060747 | 3-O-Methyl-a-methyldopa                                  | 212.0916 | 5.997917             | C/A        | UP   |
| HMDB0060776 | 5-Hydroxydantrolene                                      | 329.0515 | 5.20685              | D/B        | UP   |

A, B, C, D and E represent the grouping of 5 time points; DOWN indicates that the expression of metabolites is down regulated in the group represented by molecules compared with the group represented by denominator; Similarly, UP expression was up-regulated. For example, "E/A, DOWN" indicates that the expression of this metabolite is down regulated in group E compared with group A.



**Table S4.** The result of KEGG analysis.

| No. | category                             | annotation                                  | Count       |
|-----|--------------------------------------|---------------------------------------------|-------------|
| 1   | Cellular Processes                   | Cell growth and death                       | HMDB0001049 |
| 2   |                                      | Transport and catabolism                    | HMDB0009378 |
| 3   | Drug Development                     | Target-based classification: Ion channels   | HMDB0015330 |
| 4   | Environmental Information Processing | Membrane transport                          | HMDB0000195 |
| 5   | Human Diseases                       | Cancer: overview                            | HMDB0007961 |
| 6   |                                      | Immune disease                              | HMDB0010166 |
| 7   |                                      | Infectious disease: bacterial               | HMDB0009378 |
| 8   |                                      | Infectious disease: parasitic               | HMDB0010166 |
| 9   |                                      | Infectious disease: viral                   | HMDB0009378 |
| 10  |                                      | Neurodegenerative disease                   | HMDB0033123 |
| 11  |                                      | Lipid metabolism                            | HMDB0006940 |
|     |                                      |                                             | HMDB0007961 |
|     |                                      |                                             | HMDB0009378 |
|     |                                      |                                             | HMDB0004667 |
|     |                                      |                                             | HMDB0000949 |
| 12  |                                      | Amino acid metabolism                       | HMDB0010166 |
|     |                                      |                                             | HMDB0060484 |
|     |                                      |                                             | HMDB0000205 |
| 13  | Metabolism                           | Chemical structure transformation maps      | HMDB0010166 |
|     |                                      |                                             | HMDB0000205 |
|     |                                      |                                             | HMDB0015330 |
|     |                                      |                                             | HMDB0001049 |
| 14  |                                      | Metabolism of other amino acids             | HMDB0003339 |
|     |                                      |                                             | HMDB0000195 |
| 15  |                                      | Nucleotide metabolism                       | HMDB0000157 |
|     |                                      |                                             | HMDB0029638 |
| 16  |                                      | Xenobiotics biodegradation and metabolism   | HMDB0015086 |
|     |                                      |                                             | HMDB0000205 |
| 17  | Organismal Systems                   | Biosynthesis of other secondary metabolites | HMDB0000205 |
| 18  |                                      | Glycan biosynthesis and metabolism          | HMDB0009378 |
| 19  |                                      | Digestive system                            | HMDB0033123 |
| 20  |                                      | Nervous system                              | HMDB0001929 |
| 21  |                                      | Endocrine system                            | HMDB0007961 |
|     |                                      |                                             | HMDB0009378 |
|     |                                      |                                             | HMDB0004667 |

**Table S5.** The result of HMDB analysis.

| No. | annotation                                | Count                                                                                                                                                                                                                                                                                                                                                                                                                                                                                                                                                                                                                                                                                                                                                                                                                                                                      |
|-----|-------------------------------------------|----------------------------------------------------------------------------------------------------------------------------------------------------------------------------------------------------------------------------------------------------------------------------------------------------------------------------------------------------------------------------------------------------------------------------------------------------------------------------------------------------------------------------------------------------------------------------------------------------------------------------------------------------------------------------------------------------------------------------------------------------------------------------------------------------------------------------------------------------------------------------|
| 1   | Lipids and lipid-like molecules           | HMDB0000477; HMDB0000552; HMDB0000949; HMDB0000969; HMDB0002689; HMDB0004049; HMDB0004198; HMDB0004667; HMDB0005821; HMDB0006469; HMDB0006940; HMDB0007931; HMDB0007961; HMDB0008394; HMDB0008850; HMDB0008892; HMDB0008916; HMDB0009048; HMDB0009378; HMDB0010166; HMDB0010569; HMDB0010730; HMDB0011386; HMDB0011401; HMDB0011403; HMDB0011416; HMDB0011760; HMDB0011761; HMDB0011763; HMDB0015668; HMDB0031048; HMDB0031054; HMDB0032240; HMDB0033643; HMDB0034293; HMDB0035779; HMDB0036093; HMDB0036195; HMDB0036731; HMDB0036756; HMDB0037028; HMDB0037834; HMDB0039155; HMDB0043117; HMDB0060107 HMDB0000157; HMDB0000942; HMDB0001896; HMDB0001929; HMDB0014353; HMDB0014727; HMDB0015086; HMDB0015133; HMDB0030492; HMDB0030686; HMDB0031929; HMDB0033123; HMDB0034056; HMDB0034672; HMDB0040033; HMDB0040045; HMDB0040972; HMDB0059856; HMDB0060484; HMDB0060776 |
| 2   | Organoheterocyclic compounds              | HMDB0000759; HMDB0001049; HMDB0001125; HMDB0003339; HMDB0013246; HMDB0013331; HMDB0028716; HMDB0029081; HMDB0029112; HMDB0032662; HMDB0033433; HMDB0034276; HMDB0040694; HMDB0060747                                                                                                                                                                                                                                                                                                                                                                                                                                                                                                                                                                                                                                                                                       |
| 3   | Organic acids and derivatives             | HMDB0000205; HMDB0001867; HMDB0013973; HMDB0015377; HMDB0029638; HMDB0030903; HMDB0034206; HMDB0036006; HMDB0036021; HMDB0038522; HMDB0038523; HMDB0040768 HMDB0006372; HMDB0010316; HMDB0015330; HMDB0031486; HMDB0031972; HMDB0032864; HMDB0035571; HMDB0038630; HMDB0041787 HMDB0030254; HMDB0033512; HMDB0035404; HMDB0038128; HMDB0059631                                                                                                                                                                                                                                                                                                                                                                                                                                                                                                                             |
| 4   | Benzenoids                                | HMDB0013208; HMDB0013648; HMDB0036031; HMDB0038057                                                                                                                                                                                                                                                                                                                                                                                                                                                                                                                                                                                                                                                                                                                                                                                                                         |
| 5   | Organic oxygen compounds                  | HMDB0029838; HMDB0034881                                                                                                                                                                                                                                                                                                                                                                                                                                                                                                                                                                                                                                                                                                                                                                                                                                                   |
| 6   | Phenylpropanoids and polyketides          | HMDB0000195; HMDB0003040                                                                                                                                                                                                                                                                                                                                                                                                                                                                                                                                                                                                                                                                                                                                                                                                                                                   |
| 7   | Organic nitrogen compounds                | HMDB0037519                                                                                                                                                                                                                                                                                                                                                                                                                                                                                                                                                                                                                                                                                                                                                                                                                                                                |
| 8   | Alkaloids and derivatives                 | HMDB0006045                                                                                                                                                                                                                                                                                                                                                                                                                                                                                                                                                                                                                                                                                                                                                                                                                                                                |
| 9   | Nucleosides, nucleotides, and analogues   |                                                                                                                                                                                                                                                                                                                                                                                                                                                                                                                                                                                                                                                                                                                                                                                                                                                                            |
| 10  | Organooxygen compounds                    |                                                                                                                                                                                                                                                                                                                                                                                                                                                                                                                                                                                                                                                                                                                                                                                                                                                                            |
| 11  | Lignans, neolignans and related compounds |                                                                                                                                                                                                                                                                                                                                                                                                                                                                                                                                                                                                                                                                                                                                                                                                                                                                            |

**Table S6.** The result of LMSD analysis.

| No. | category                  | annotation                         | Count                    |
|-----|---------------------------|------------------------------------|--------------------------|
| 1   | Sterol Lipids [ST]        | Steroids [ST02]                    | HMDB0001049              |
| 2   |                           | Secosteroids [ST03]                | HMDB0009378              |
| 3   | Sphingolipids [SP]        | Ceramides [SP02]                   | HMDB0015330              |
| 4   | Polyketides [PK]          | Flavonoids [PK12]                  | HMDB0000195              |
| 5   |                           | Aromatic polyketides [PK13]        | HMDB0007961              |
| 6   | Glycerophospholipids [GP] | Glycerophosphocholines [GP01]      | HMDB0010166              |
| 7   |                           | Glycerophosphoethanolamines [GP02] | HMDB0009378              |
| 8   |                           | Fatty Acids and Conjugates [FA01]  | HMDB0010166              |
| 9   |                           | Fatty esters [FA07]                | HMDB0009378              |
| 10  | Fatty Acyls [FA]          | Fatty amides [FA08]                | HMDB0033123              |
| 11  |                           | Eicosanoids [FA03]                 | HMDB0006940; HMDB0007961 |
|     |                           |                                    | HMDB0009378; HMDB0004667 |
|     |                           |                                    | HMDB0000949; HMDB0010166 |
| 12  |                           | Fatty alcohols [FA05]              | HMDB0060484; HMDB0000205 |
|     |                           |                                    | HMDB0010166              |
| 13  |                           | Oxygenated hydrocarbons [FA12]     | HMDB0000205; HMDB0015330 |
